# Supplementary material for: Sources, Ionic Composition and Acidic Properties of Bulk and Wet Atmospheric Deposition in the Eastern Middle Adriatic Region
Source: MDPI journal article supplement (doi:10.3390/toxics11070551), 2023-06-23
Supplement: s1 [file s1]

Supplementary materials

# Sources, Ionic Composition and Acidic Properties of Bulk and Wet Atmospheric Deposition in the Eastern Middle Adriatic Region

Valentina Gluščić <sup>1</sup>, Silva Žužul <sup>1,\*</sup>, Gordana Pehnec <sup>1</sup>, Ivana Jakovljević <sup>1</sup>, Iva Šimić <sup>1</sup>, Ranka Godec <sup>1</sup>, Ivan Bešlić <sup>1</sup>, Andrea Milinković <sup>2</sup>, Saranda Bakija Alempijević <sup>2</sup> and Sanja Frka <sup>2</sup>

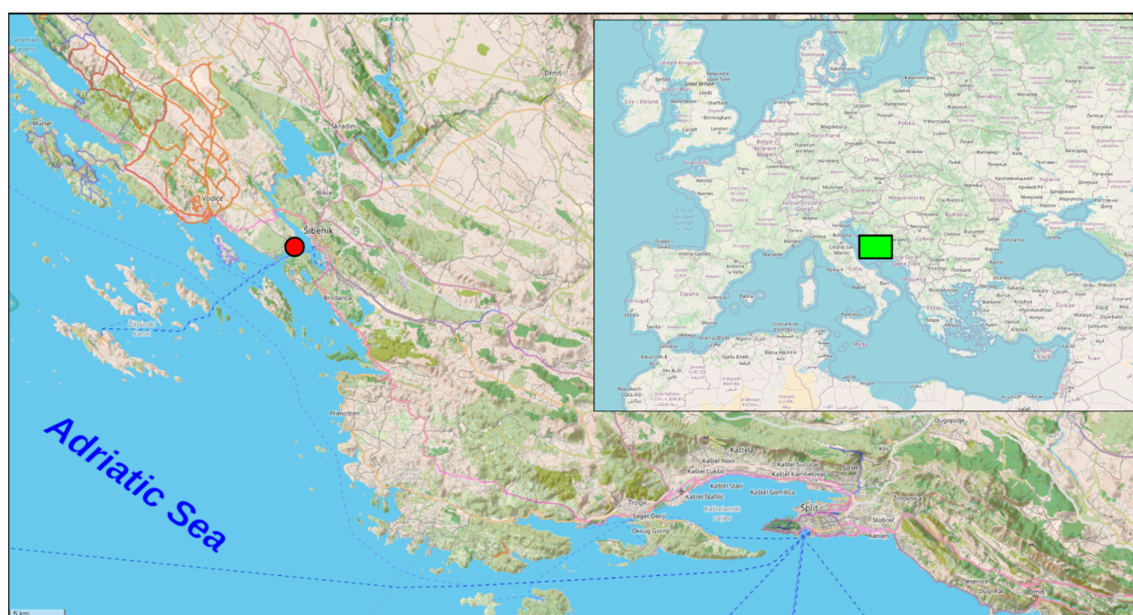

**Figure S1.** Sampling site Martinska (red dot) at the Middle Adriatic coast area (green square) (modified from <https://www.openstreetmap.org>).

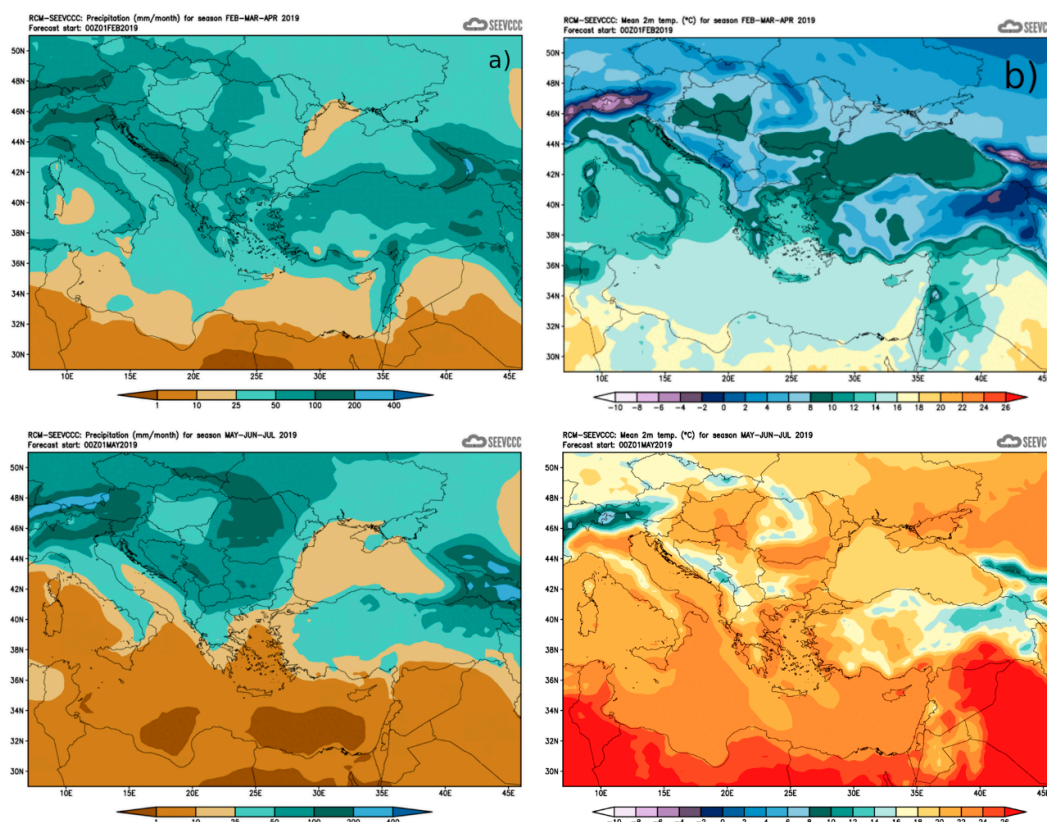

**Figure S2.** Meteorological parameters patterns in cold and warm season a) precipitation amount b) temperature (adopted from <http://www.seevccc.rs>, accessed on 5 April 2023).

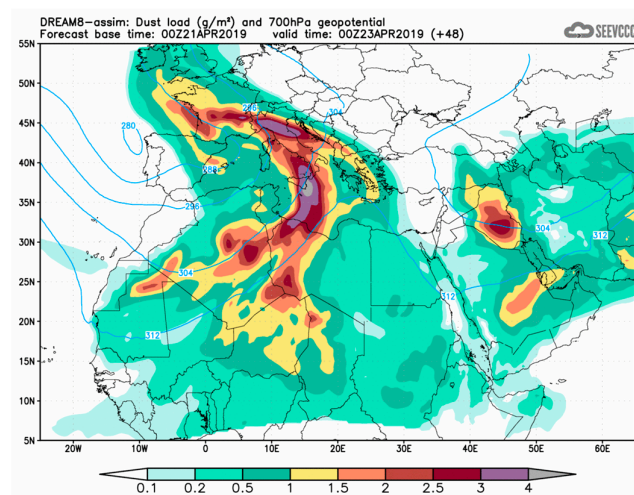

**Figure S3.** Dust loads from Sahara from 21<sup>st</sup> until 25<sup>th</sup> of April 2019 (adopted from <http://www.seevccc.rs>, accessed on 5 April 2023).

**Table S1.** Determined ion deposition fluxes ( $\text{mg m}^{-2} \text{d}^{-1}$ ) and ion equivalent concentrations ( $\mu\text{eq L}^{-1}$ ) in bulk and wet deposition content in comparison with literature (average mean values as well as minimum and maximum values in brackets) \*only maximum values.

| Bulk deposition                                                                  |                                | Cl <sup>-</sup>                          | NO <sub>3</sub> <sup>-</sup>                          | SO <sub>4</sub> <sup>2-</sup>                          | Na <sup>+</sup>                          | NH <sub>4</sub> <sup>+</sup>                          | K <sup>+</sup>                          | Mg <sup>2+</sup>                          | Ca <sup>2+</sup>                          | Reference                |
|----------------------------------------------------------------------------------|--------------------------------|------------------------------------------|-------------------------------------------------------|--------------------------------------------------------|------------------------------------------|-------------------------------------------------------|-----------------------------------------|-------------------------------------------|-------------------------------------------|--------------------------|
| Location                                                                         | Type of measuring site         | $\text{mg m}^{-2} \text{d}^{-1}$         | $\text{mg m}^{-2} \text{d}^{-1}$                      | $\text{mg m}^{-2} \text{d}^{-1}$                       | $\text{mg m}^{-2} \text{d}^{-1}$         | $\text{mg m}^{-2} \text{d}^{-1}$                      | $\text{mg m}^{-2} \text{d}^{-1}$        | $\text{mg m}^{-2} \text{d}^{-1}$          | $\text{mg m}^{-2} \text{d}^{-1}$          |                          |
| the Eastern Middle Adriatic coast                                                | a coastal-rural measuring site | 5.61 (0.15–19.44)                        | 4.25 (3.04–5.36)                                      | 3.25 (1.39–7.54)                                       | 3.43 (0.2–10.19)                         | 1.61 (0.65–4.05)                                      | 1.13 (0.11–5.75)                        | 0.65 (0.12–1.50)                          | 3.33 (1.70–7.11)                          | <i>This study</i>        |
| East Mediterranean, Aliaga region, western part of Turkey at coast of Aegean Sea | industrial                     |                                          |                                                       |                                                        | 5.968                                    |                                                       | 1.960                                   | 5.794                                     | 28.168                                    | Kara et al. 2014         |
|                                                                                  | residential area               |                                          |                                                       |                                                        | 5.293                                    |                                                       | 3.426                                   | 2.539                                     | 9.820                                     |                          |
|                                                                                  | background                     |                                          |                                                       |                                                        | 2.698                                    |                                                       | 0.951                                   | 0.850                                     | 3.748                                     |                          |
| the south centre part of Cuba on the coast of the Caribbean Sea                  | rural area                     |                                          |                                                       |                                                        | 2.801 (1.027–8.008)                      |                                                       | 0.637 (0.232–1.085)                     | 0.493 (0.205–1.247)                       | 3.259 (1.692–8.051)                       | Morera-Gómez et al. 2019 |
| Middle Mediterranean, North Adriatic, the Lagoon of Venice                       | industrial                     |                                          |                                                       |                                                        | 2.684                                    |                                                       | 0.978                                   | 1.130                                     | 6.782                                     | Rossini et al. 2005      |
|                                                                                  | urban                          |                                          |                                                       |                                                        | 5.250                                    |                                                       | 1.327                                   | 1.354                                     | 3.849                                     |                          |
|                                                                                  | a remote site B                |                                          |                                                       |                                                        | 3.925                                    |                                                       | 1.024                                   | 1.759                                     | 6.046                                     |                          |
| Western Mediterranean, the Isle of Mallorca, Balearic Islands, Spain             | a remote site C                |                                          |                                                       |                                                        | 4.596                                    |                                                       | 0.801                                   | 1.038                                     | 3.511                                     | Cerro et al. 2020        |
| the Eastern Middle Adriatic coast                                                | regional background            | 20.93                                    | 4.03                                                  | 7.47                                                   | 10.42                                    | 0.57                                                  | 1.69                                    | 1.34                                      | 2.91                                      |                          |
|                                                                                  |                                |                                          |                                                       |                                                        |                                          |                                                       |                                         |                                           |                                           |                          |
| Location                                                                         | Type of measuring site         | Cl <sup>-</sup><br>$\mu\text{eq L}^{-1}$ | NO <sub>3</sub> <sup>-</sup><br>$\mu\text{eq L}^{-1}$ | SO <sub>4</sub> <sup>2-</sup><br>$\mu\text{eq L}^{-1}$ | Na <sup>+</sup><br>$\mu\text{eq L}^{-1}$ | NH <sub>4</sub> <sup>+</sup><br>$\mu\text{eq L}^{-1}$ | K <sup>+</sup><br>$\mu\text{eq L}^{-1}$ | Mg <sup>2+</sup><br>$\mu\text{eq L}^{-1}$ | Ca <sup>2+</sup><br>$\mu\text{eq L}^{-1}$ | Reference                |
| the Eastern Middle Adriatic coast                                                | a coastal-rural measuring site | 82.09 (2.25–265.07)                      | 35.3 (25.81–48.71)                                    | 35.28 (15.21–88.54)                                    | 78.43 (4.66–249.69)                      | 46.57 (18.96–126.88)                                  | 15.14 (1.31–83.12)                      | 28.14 (4.57–64.41)                        | 85.46 (38.29–173.79)                      | <i>This study</i>        |
| Western Mediterranean, North East Spain                                          | rural background site          | 16.3 (3.64–103)                          | 35.5 (5.29–167)                                       | 27.7 (6.10–138)                                        | 14.7 (2.99–89.4)                         | 27.8 (1.62–129)                                       | 4.14 (0.66–17.7)                        | 10.1 (0.84–61.3)                          | 71.7 (5.39–609)                           | Izquierdo and Avila 2012 |

| Middle Mediterranean, Northern Italy, Po Valley                         | residential urban              | 206 (9.8 – 3487.7)                                 | 143.9 (10.1 – 1592.7)                                           | 265.3 (13.9 – 3336.5)                                            | 178.4 (5.4 – 3161.5)                               | 111.2 (0 – 948)                                                 | 57.3 (0 – 803.6)                                  | 55.2 (0 – 639.4)                                    | 279.3 (10.7 – 3016.0)                               | Pieri et al. 2010              |
|-------------------------------------------------------------------------|--------------------------------|----------------------------------------------------|-----------------------------------------------------------------|------------------------------------------------------------------|----------------------------------------------------|-----------------------------------------------------------------|---------------------------------------------------|-----------------------------------------------------|-----------------------------------------------------|--------------------------------|
|                                                                         | rural                          | 115.1 (12.9 – 811.8)                               | 165.4 (12.9 – 1909.1)                                           | 195.5 (18.2 – 1936.7)                                            | 115.1 (8.7 – 828.1)                                | 148.1 (0 – 857.1)                                               | 32.9 (0 – 247.8)                                  | 35.5 (0 – 375.8)                                    | 206.3 (17.0 – 2095.8)                               |                                |
| Wet deposition                                                          |                                |                                                    |                                                                 |                                                                  |                                                    |                                                                 |                                                   |                                                     |                                                     |                                |
| Location                                                                | Type of measuring site         | Cl <sup>-</sup> mg m <sup>-2</sup> d <sup>-1</sup> | NO <sub>3</sub> <sup>-</sup> mg m <sup>-2</sup> d <sup>-1</sup> | SO <sub>4</sub> <sup>2-</sup> mg m <sup>-2</sup> d <sup>-1</sup> | Na <sup>+</sup> mg m <sup>-2</sup> d <sup>-1</sup> | NH <sub>4</sub> <sup>+</sup> mg m <sup>-2</sup> d <sup>-1</sup> | K <sup>+</sup> mg m <sup>-2</sup> d <sup>-1</sup> | Mg <sup>2+</sup> mg m <sup>-2</sup> d <sup>-1</sup> | Ca <sup>2+</sup> mg m <sup>-2</sup> d <sup>-1</sup> | Reference                      |
| the Eastern Middle Adriatic coast                                       |                                | 2.91 (0.41 – 7)                                    | 2.46 (0.59 – 4.38)                                              | 1.86 (0.47 – 3.28)                                               | 1.62 (0.28 – 4.92)                                 | 1.06 (0.34 – 1.99)                                              | 0.21 (0.04 – 0.45)                                | 0.24 (0.04 – 0.66)                                  | 1.21 (0.15 – 2.71)                                  | <i>This study</i>              |
| Western Mediterranean, the Isle of Mallorca (Spain)                     | regional background            | 15.39 (206.614*)                                   | 3.13 (35.046*)                                                  | 6.16 (100.492*)                                                  | 7.75 (119.755*)                                    | 0.52 (6.907*)                                                   | 1.03 (13.064*)                                    | 0.99 (12.966*)                                      | 1.68 (20.999*)                                      | Cerro et al. 2020              |
| Location                                                                | Type of measuring site         | Cl <sup>-</sup> µeq L <sup>-1</sup>                | NO <sub>3</sub> <sup>-</sup> µeq L <sup>-1</sup>                | SO <sub>4</sub> <sup>2-</sup> µeq L <sup>-1</sup>                | Na <sup>+</sup> µeq L <sup>-1</sup>                | NH <sub>4</sub> <sup>+</sup> µeq L <sup>-1</sup>                | K <sup>+</sup> µeq L <sup>-1</sup>                | Mg <sup>2+</sup> µeq L <sup>-1</sup>                | Ca <sup>2+</sup> µeq L <sup>-1</sup>                |                                |
| the Eastern Middle Adriatic coast                                       | a coastal-rural measuring site | 59.50(21.4 – 129.01)                               | 38.30(27.5 – 53.55)                                             | 37.34(19.7 – 58.33)                                              | 64.12(22.9 – 113.38)                               | 63.29(28.0 – 104.71)                                            | 4.96(2.37 – 10.11)                                | 18.52(7.21 – 32.01)                                 | 55.16(16.1 – 118.22)                                | <i>This study</i>              |
| Western Mediterranean, North East Spain                                 | rural background site          | 10.8 (2.20 – 78.2)                                 | 33.5 (3.49 – 161)                                               | 26.1 (4.40 – 151)                                                | 11.0 (1.80 – 78.7)                                 | 40.2 (3.44 – 126)                                               | 3.27 (0.50 – 14.6)                                | 7.22 (0.93 – 63.0)                                  | 56.6 (5.05 – 723)                                   | Izquierdo and Avila 2012       |
| Eastern Mediterranean, the city center of Thessaloniki, northern Greece | Urban site                     | 70.3(9.0 – 827)                                    | 72.7(15.2 – 498)                                                | 163(26 – 1223)                                                   | 73.3(11.7 – 473)                                   | 56.1(0.87 – 781)                                                | 15.3(0.51 – 126)                                  | 31.9(2.33 – 562)                                    | 323(10.5 – 1788)                                    | Anatolaki and Tsitouridou 2009 |
| Eastern Mediterranean, the city center of Thessaloniki, northern Greece | Urban site                     | 136(9.9 – 1071)                                    | 112(6.9 – 891)                                                  | 271(13.1 – 1802)                                                 | 120(1.74 – 1075)                                   | 131(1.67 – 911)                                                 | 43.8(2.05 – 253)                                  | 84.7(0.67 – 938)                                    | 619(15.5 – 3573)                                    | Anatolaki and Tsitouridou 2009 |
| The northern part of the inner Eastern Carpathians, Romania             | Urban                          | 47.05 (4.85 – 432.83)                              | 34.90 (0.48 – 782.20)                                           | 173.32 (0.02 – 3667.50)                                          | 36 (1.26 – 1194.01)                                | 54.45(1.11 – 359.95)                                            | 13.25(0.43 – 181.08)                              | 28.10(2.88 – 239.46)                                | 250.12(18.11 – 7440.49)                             | Keresztes et al. 2020          |
|                                                                         | Urban                          | 50.07(0.03 – 518.29)                               | 33.71(1.85 – 188.49)                                            | 77.95(0.77 – 788.86)                                             | 35.95(2.16 – 409.75)                               | 83.94(2.27 – 699.89)                                            | 24.56(1.59 – 268.30)                              | 39.51(7.49 – 530.34)                                | 148.95(2.2 – 51468.64)                              |                                |

|                 |                                                                                    |                       |                    |                     |                       |                       |                     |                     |                      |
|-----------------|------------------------------------------------------------------------------------|-----------------------|--------------------|---------------------|-----------------------|-----------------------|---------------------|---------------------|----------------------|
|                 | Urban                                                                              | 57.80(2.43-331.31)    | 38.38(0.53-563.87) | 84.13(0.50-815.72)  | 50.69(1.74-398.0)     | 101.68(5.9-3032.41)   | 39.49(2.05-503.09)  | 49.70(8.06-579.30)  | 185.22(3.1-91813.96) |
|                 |                                                                                    | 58.78                 | 36.72              | 75.98               | 38.38                 | 81.23                 | 64.76               | 40.28               | 148.75               |
|                 | Urban                                                                              | (1.75-309.48)         | (0.16-583.34)      | (0.15-697.46)       | (0.96-472.38)         | (0.78-1905.65)        | (2.92-1606.21)      | (10.37-603.83)      | (24.0-2012.58)       |
| US West coast   | A coastal urban                                                                    | 24.96(0.39-694.37)    | 2.85(0.15-111.05)  | 6.50(0.38-91.38)    | 19.53(0.13-247.00)    | 3.34(0.22-234.78)     | 0.64(0.05-9.00)     | 2.81(0.08-17.42)    | 3.16(0.15-65.20)     |
|                 | A coastal urban                                                                    | 13.06(0.25-80.56)     | 6.17(0.74-125.47)  | 5.79(0.29-83.06)    | 11.11(0.04-70.91)     | 6.92(0.33-214.83)     | 0.64(0.05-9.00)     | 2.81(0.08-17.42)    | 3.16(0.15-65.20)     |
|                 | A coastal urban                                                                    | 28.12(0.31-458.17)    | 30.89(1.98-248.97) | 15.10(0.88-128.60)  | 25.82(0.1-432.70)     | 27.01(1.28-161.22)    | 1.18(0.13-432.70)   | 6.87(0.08-106.33)   | 10.36(0.45-238.75)   |
| US East coast   | A coastal urban near metropolitan cities                                           | 40.11(1.18-361.75)    | 15.89(1.00-115.71) | 23.51(1.46-202.56)  | 34.03(0.57-314.87)    | 16.35(0.44-108.00)    | 1.90(0.05-53.44)    | 6.26(0.33-71.50)    | 5.00(3.76-6.47)      |
|                 | A coastal urban                                                                    | 33.30(0.99-409.41)    | 11.82(0.76-61.03)  | 19.01(3.02-129.44)  | 28.34(0.57-333.13)    | 7.17(0.76-61.03)      | 0.99(0.05-7.67)     | 6.85(0.25-79.58)    | 5.62(0.85-70.60)     |
|                 | A coastal urban                                                                    | 55.47(5.21-918.55)    | 11.94(5.21-918.85) | 20.64(1.44-125.10)  | 48.33(4.30-809.39)    | 12.01(0.11-57.24)     | 2.86(0.13-46.03)    | 11.59(0.58-180.00)  | 10.23(0.90-148.80)   |
| the Hawaii      | a coastal urban under high influence of local volcanic emissions                   | 7.47(0.56-132.39)     | 2.43(0.32-20.81)   | 25.86(0.83-610.42)  | 13.96(0.13-820.87)    | 3.23(0.56-47.22)      | 0.75(0.05-38.92)    | 3.39(0.25-85.67)    | 5.10(0.50-75.00)     |
| the Bermuda     | a coastal urban under high influence of anthropogenic emissions from North America | 358.71(8.35-19891.06) | 8.34(0.11-76.42)   | 47.35(1.31-942.33)  | 305.11(6.09-16670.29) | 4.62(0.11-50.34)      | 6.61(0.08-332.48)   | 69.20(1.73-3640.48) | 17.36(0.10-823.35)   |
| the Philippines | a coastal urban with biomass burning sources, vehicles, and industry               | 48.75(3.78-2126.4)    | 33.99(0.27-520.92) | 71.71(9.24-1088.90) | 40.31(3.35-1739.89)   | 253.26(0.61-11006.10) | 43.68(0.26-1537.54) | 23.19(0.41-309.42)  | 57.66(1.50-877.69)   |

Ma et al.  
2021

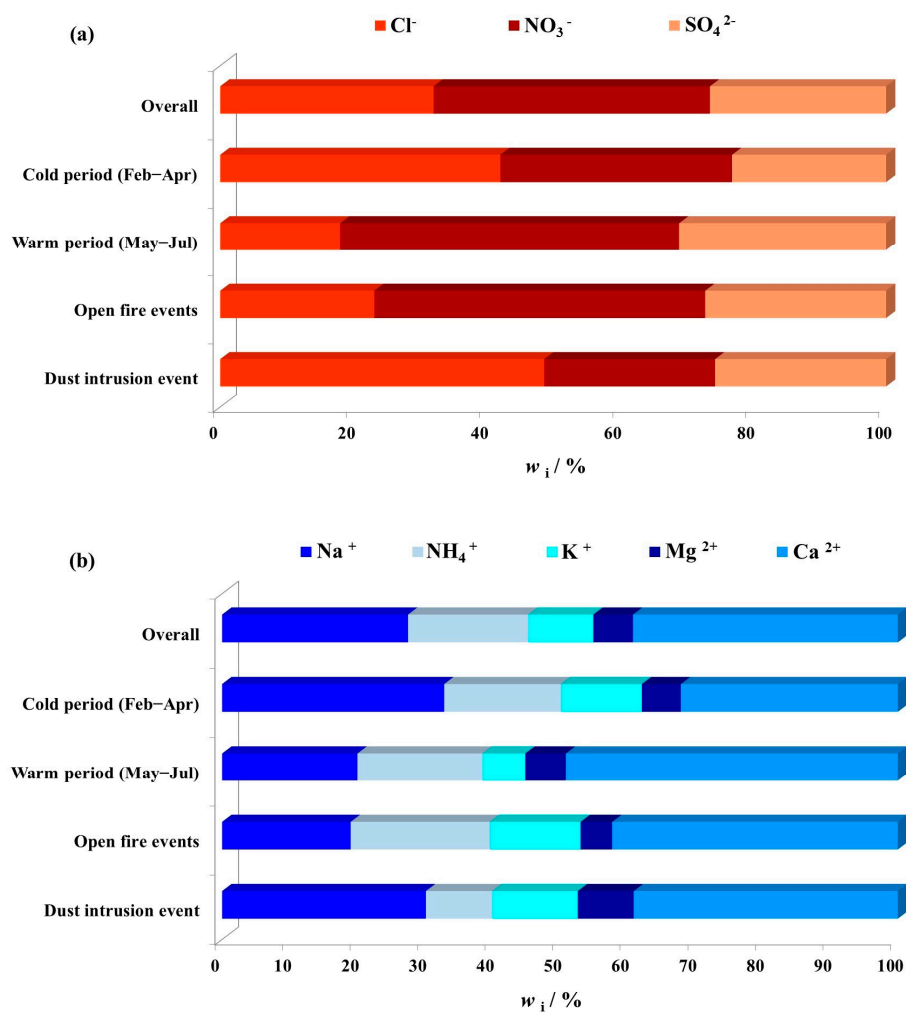

**Figure S4.** Average contributions of (a) each anion to the total anion flux and (b) each cation to the total cation flux determined in the bulk samples during the sampling campaign from February to July 2019 at the Middle Adriatic coastal site.

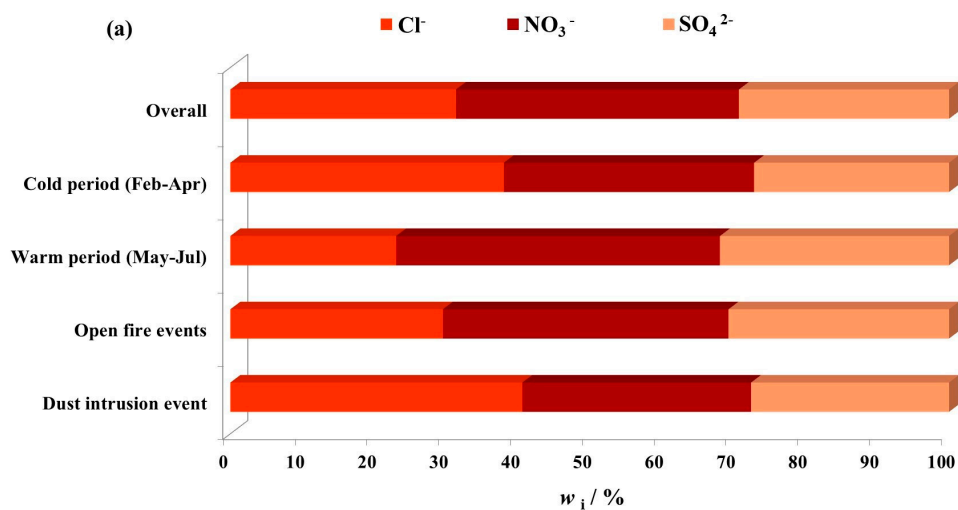

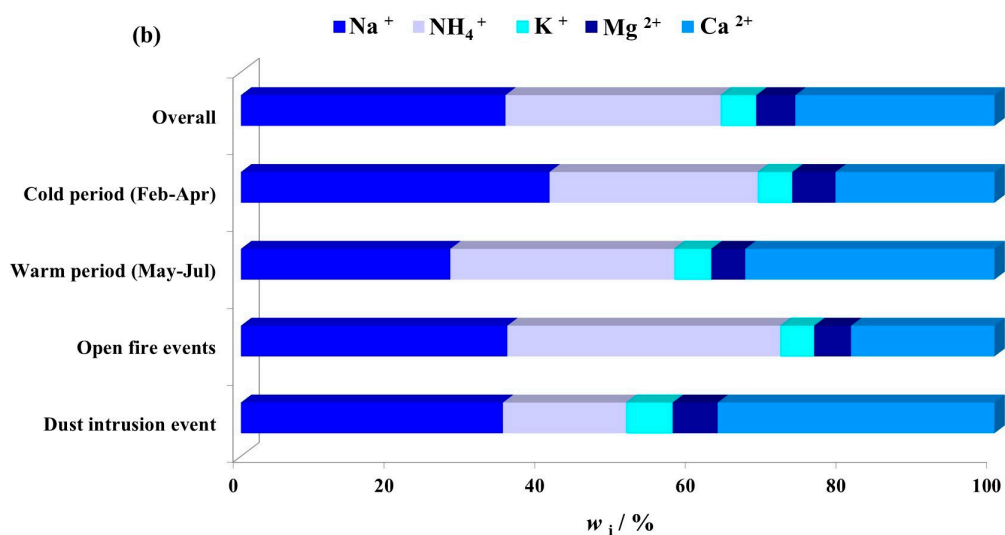

**Figure S5.** Average contributions of (a) each anion to the total anion flux and (b) each cation to the total cation flux determined in the wet deposition samples during the sampling campaign from February to July 2019 at the Middle Adriatic coastal site.

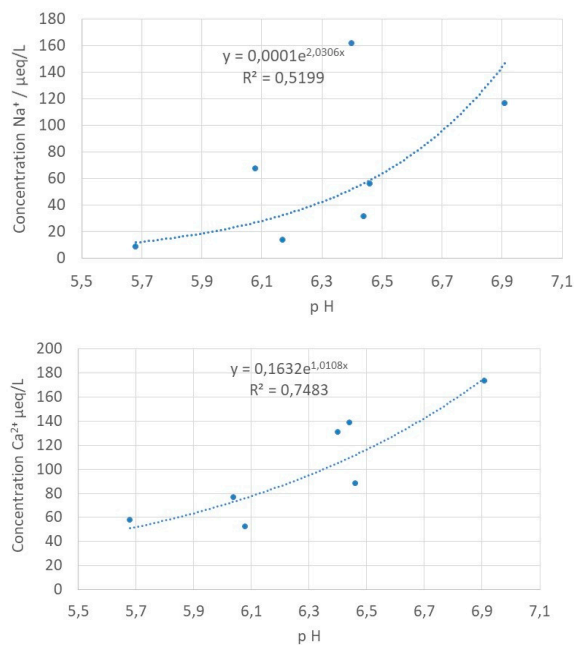

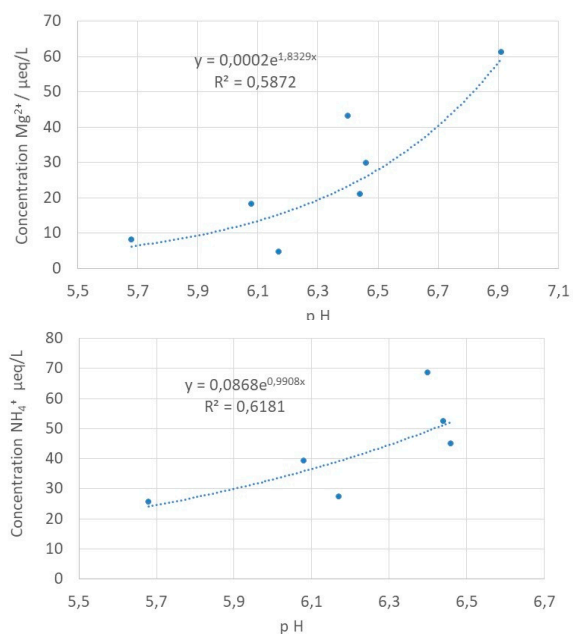

**Figure S6.** Relationship between pH and the equivalent concentrations of  $\text{Na}^+$ ,  $\text{Ca}^{2+}$ ,  $\text{Mg}^{2+}$  and  $\text{NH}_4^+$  in bulk deposition samples.

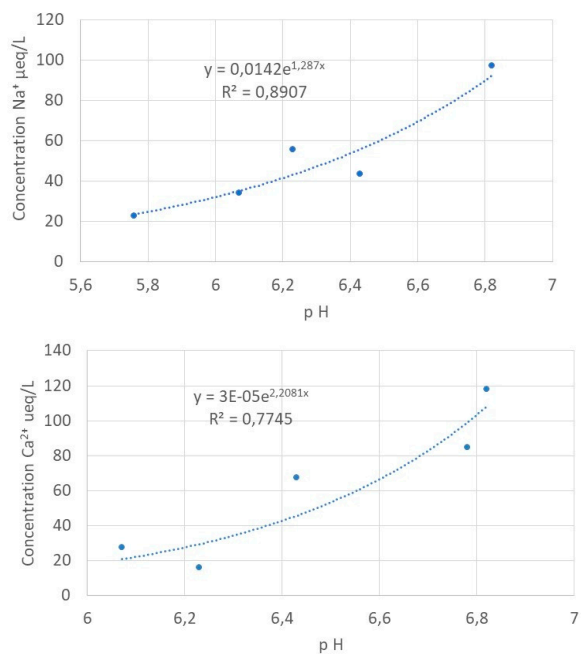



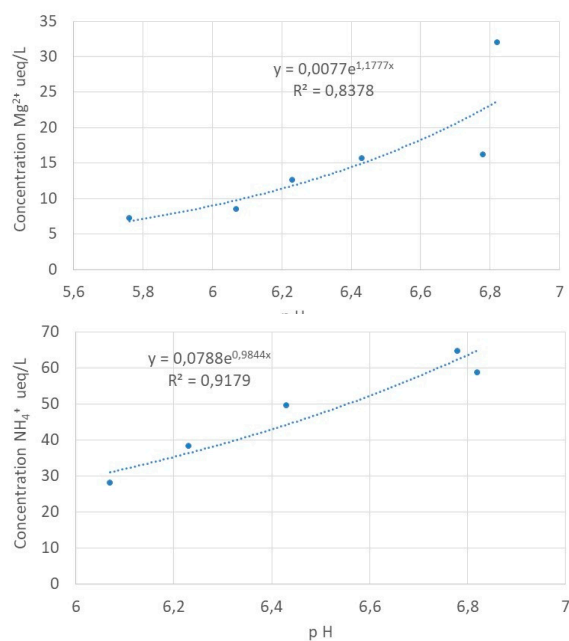

**Figure S7.** Relationship between pH and the equivalent concentrations of  $\text{Na}^+$ ,  $\text{Ca}^{2+}$ ,  $\text{Mg}^{2+}$  and  $\text{NH}_4^+$  in wet deposition samples.

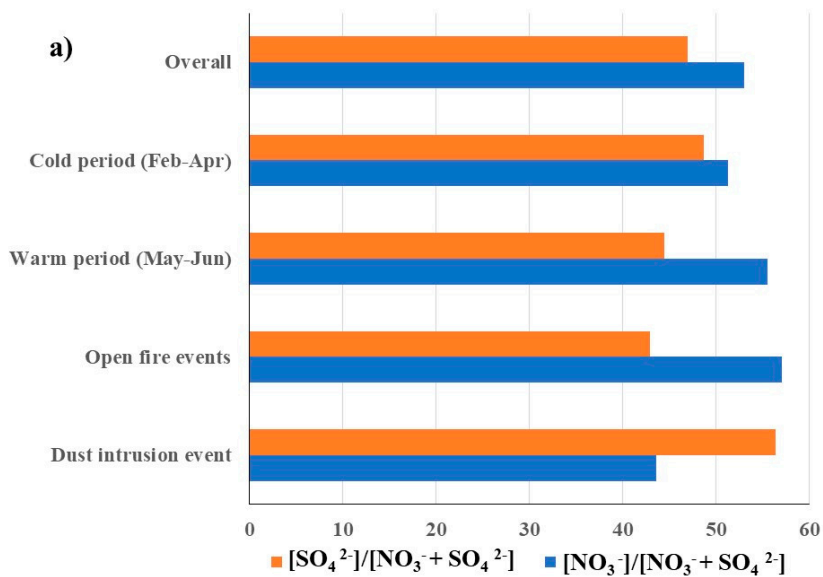

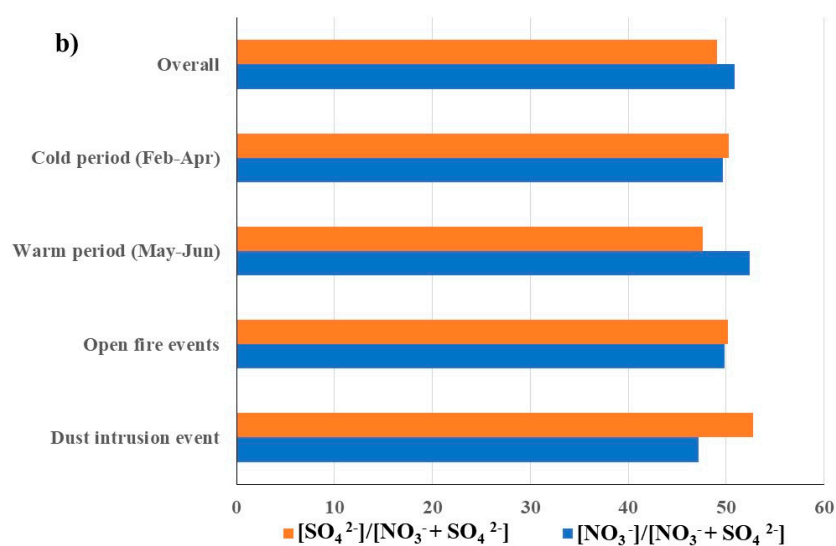

**Figure S8.** Average equivalent ratios;  $[\text{NO}_3^-]/[\text{NO}_3^- + \text{SO}_4^{2-}]$  and  $[\text{SO}_4^{2-}]/[\text{NO}_3^- + \text{SO}_4^{2-}]$  in (a) bulk deposition and (b) wet deposition for overall period, cold and warm seasons and special events.

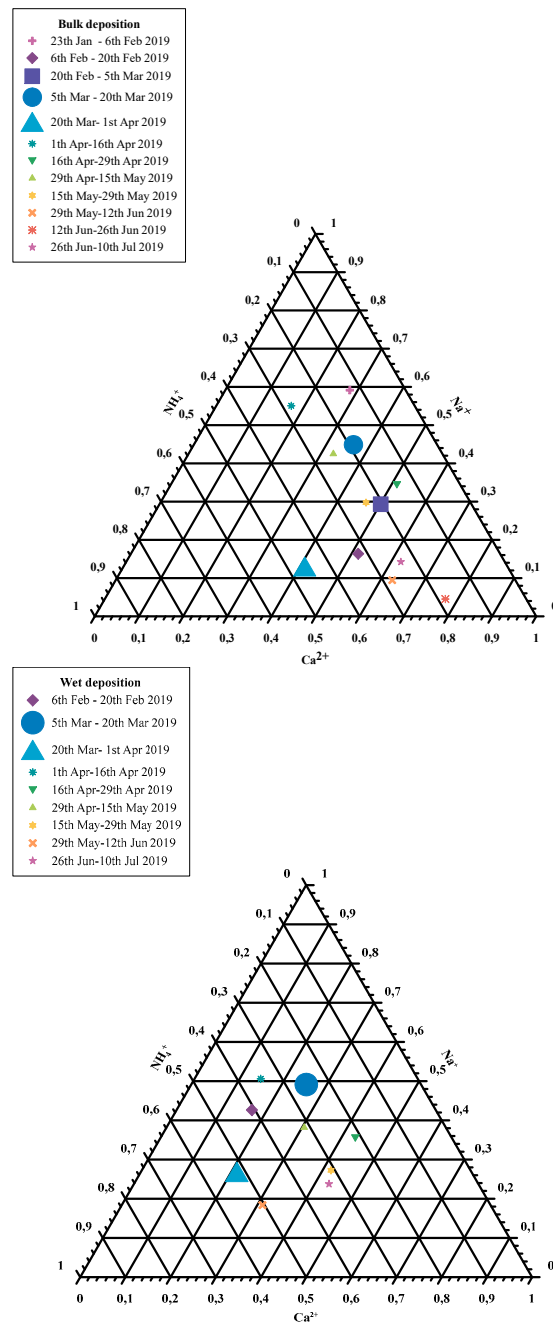

**Figure S9.** Relative proportion of major cation NFs in bulk and wet deposition.

**Table S2.** Comparison of multiple linear regression equations obtained in this study with similar studies.

| Location, sample type                             | Linear regression equation                                                                                                                                                                                                                                                                                                                                                                                                             | Reference  |
|---------------------------------------------------|----------------------------------------------------------------------------------------------------------------------------------------------------------------------------------------------------------------------------------------------------------------------------------------------------------------------------------------------------------------------------------------------------------------------------------------|------------|
| the Eastern Middle Adriatic coast Bulk deposition | $[\text{NO}_3^-] = 15.667 - 0.034[\text{Na}^+] + 0.544[\text{NH}_4^+] - 0.435[\text{K}^+] + 0.130[\text{Mg}^{2+}] - 0.001[\text{Ca}^{2+}]$<br>$[\text{SO}_4^{2-}] = 2.540 + 0.019[\text{Na}^+] + 0.548[\text{NH}_4^+] - 0.178[\text{K}^+] + 0.427[\text{Mg}^{2+}] - 0.042[\text{Ca}^{2+}]$<br>$[\text{Cl}^-] = 36.155 + 1.457[\text{Na}^+] - 1.202[\text{NH}_4^+] + 0.252[\text{K}^+] - 0.131[\text{Mg}^{2+}] - 0.147[\text{Ca}^{2+}]$ | This study |
| the Eastern Middle Adriatic coast Wet deposition  | $[\text{NO}_3^-] = 17.288 - 0.089[\text{Na}^+] + 0.304[\text{NH}_4^+] - 0.163[\text{K}^+] + 0.489[\text{Mg}^{2+}] - 0.014[\text{Ca}^{2+}]$<br>$[\text{SO}_4^{2-}] = 23.397 - 0.779[\text{Na}^+] + 0.157[\text{NH}_4^+] + 2.534[\text{K}^+] + 3.475[\text{Mg}^{2+}] - 0.417[\text{Ca}^{2+}]$<br>$[\text{Cl}^-] = 2.188 - 0.156[\text{Na}^+] + 0.091[\text{NH}_4^+] + 0.365[\text{K}^+] - 5.075[\text{Mg}^{2+}] - 0.621[\text{Ca}^{2+}]$ | This study |
| Central Anatolia,                                 | $[\text{NO}_3^-] = -0.35 + 0.16[\text{H}^+] + 0.56[\text{Ca}^{2+}] + 0.24[\text{NH}_4^+] + 0.13[\text{Na}^+]$                                                                                                                                                                                                                                                                                                                          | [78]       |

|                              |                                                                                                                                                                                                                                                                                                                                    |      |
|------------------------------|------------------------------------------------------------------------------------------------------------------------------------------------------------------------------------------------------------------------------------------------------------------------------------------------------------------------------------|------|
| rainwater                    | $[\text{SO}_4^{2-}] = 1.9 + 0.08[\text{H}^+] + 0.19[\text{Ca}^{2+}] + 0.11[\text{NH}_4^+] + 0.22[\text{Mg}^{2+}] + 0.15[\text{Na}^+]$                                                                                                                                                                                              |      |
| Mediterranean, rainwater     | $[\text{NO}_3^-] = -1.1 + 0.85[\text{H}^+] + 0.6[\text{Ca}^{2+}] + 0.72[\text{NH}_4^+]$<br>$[\text{SO}_4^{2-}] = 14 + 0.01[\text{H}^+] + 0.19[\text{Ca}^{2+}] + 0.14[\text{NH}_4^+] + 0.64[\text{Mg}^{2+}]$                                                                                                                        | [78] |
| Black Sea, rainwater         | $[\text{NO}_3^-] = -7.1 + 0.22[\text{H}^+] + 0.11[\text{Ca}^{2+}] + 0.27[\text{NH}_4^+]$<br>$[\text{SO}_4^{2-}] = 1.4 + 0.06[\text{H}^+] + 0.15[\text{Ca}^{2+}] + 0.25[\text{NH}_4^+] + 0.04[\text{Mg}^{2+}]$                                                                                                                      | [78] |
| Shanghai, China, rainwater   | $[\text{NO}_3^-] = 0.311[\text{NH}_4^+] + 0.181[\text{Ca}^{2+}] + 15.602$<br>$[\text{SO}_4^{2-}] = 0.491[\text{NH}_4^+] + 0.342[\text{Ca}^{2+}] + 26.344$                                                                                                                                                                          | [67] |
| Jabiru, Australia, rainwater | $[\text{NO}_3^-] = 1.71 + 0.14[\text{H}^+] + 0.18[\text{NH}_4^+] - 0.01[\text{Na}^+] - 0.77[\text{K}^+]$<br>$[\text{SO}_4^{2-}] = -3.93 + 0.30[\text{H}^+] + 0.01[\text{NH}_4^+] + 0.06[\text{Na}^+] + 0.74[\text{K}^+]$<br>$[\text{Cl}^-] = 2.71 + 0.13[\text{H}^+] + 0.66[\text{NH}_4^+] + 0.63[\text{Na}^+] + 0.54[\text{K}^+]$ | [79] |

**Table S3.** Correlation coefficients between ionic species in bulk and wet deposition at Martinska site; statistically significant correlations ( $P < 0.05$ ) were marked red.

|                 |                    | $\text{NO}_3^-$ | $\text{SO}_4^{2-}$ | $\text{Na}^+$ | $\text{NH}_4^+$ | $\text{K}^+$ | $\text{Mg}^{2+}$ | $\text{Ca}^{2+}$ |
|-----------------|--------------------|-----------------|--------------------|---------------|-----------------|--------------|------------------|------------------|
| Bulk deposition | $\text{Cl}^-$      | 0.603           | 0.850              | 0.966         | 0.669           | 0.553        | 0.876            | 0.273            |
|                 | $\text{NO}_3^-$    |                 | 0.824              | 0.711         | 0.809           | 0.448        | 0.620            | 0.460            |
|                 | $\text{SO}_4^{2-}$ |                 |                    | 0.927         | 0.925           | 0.775        | 0.864            | 0.391            |
|                 | $\text{Na}^+$      |                 |                    |               | 0.804           | 0.662        | 0.916            | 0.351            |
|                 | $\text{NH}_4^+$    |                 |                    |               |                 | 0.879        | 0.693            | 0.254            |
|                 | $\text{K}^+$       |                 |                    |               |                 |              | 0.608            | 0.097            |
|                 | $\text{Mg}^{2+}$   |                 |                    |               |                 |              |                  | 0.618            |
| Wet deposition  | $\text{Cl}^-$      | 0.645           | 0.931              | 0.999         | 0.929           | 0.846        | 0.858            | 0.116            |
|                 | $\text{NO}_3^-$    |                 | 0.715              | 0.645         | 0.747           | 0.395        | 0.426            | 0.194            |
|                 | $\text{SO}_4^{2-}$ |                 |                    | 0.921         | 0.996           | 0.922        | 0.785            | 0.086            |
|                 | $\text{Na}^+$      |                 |                    |               | 0.919           | 0.831        | 0.866            | 0.129            |
|                 | $\text{NH}_4^+$    |                 |                    |               |                 | 0.900        | 0.740            | 0.028            |
|                 | $\text{K}^+$       |                 |                    |               |                 |              | 0.766            | -0.010           |
|                 | $\text{Mg}^{2+}$   |                 |                    |               |                 |              |                  | 0.496            |

**Table S4.** Enrichment factors in bulk deposition samples.

| Measuring period                                 | MARINE                     |                           |                               |                               |                                 | CRUSTAL                    |                           |                            |                               |                                 |
|--------------------------------------------------|----------------------------|---------------------------|-------------------------------|-------------------------------|---------------------------------|----------------------------|---------------------------|----------------------------|-------------------------------|---------------------------------|
|                                                  | $\text{EF}_m(\text{Cl}^-)$ | $\text{EF}_m(\text{K}^+)$ | $\text{EF}_m(\text{Ca}^{2+})$ | $\text{EF}_m(\text{Mg}^{2+})$ | $\text{EF}_m(\text{SO}_4^{2-})$ | $\text{EF}_c(\text{Cl}^-)$ | $\text{EF}_c(\text{K}^+)$ | $\text{EF}_c(\text{Na}^+)$ | $\text{EF}_c(\text{Mg}^{2+})$ | $\text{EF}_c(\text{SO}_4^{2-})$ |
| 23 <sup>th</sup> Jan - 6 <sup>th</sup> Feb 2019  | 1.24                       | 1.82                      | 10.84                         | 1.34                          | 2.27                            | 974.26                     | 0.17                      | 3.68                       | 1.14                          | 30.68                           |
| 6 <sup>th</sup> Feb - 20 <sup>th</sup> Feb 2019  | 0.96                       | 4.28                      | 71.49                         | 1.44                          | 9.38                            | 113.84                     | 0.06                      | 0.56                       | 0.19                          | 19.18                           |
| 20 <sup>th</sup> Feb - 5 <sup>th</sup> Mar 2019  | 1.18                       | 2.50                      | 38.80                         | 1.39                          | 4.19                            | 259.15                     | 0.06                      | 1.03                       | 0.33                          | 15.80                           |
| 5 <sup>th</sup> Mar - 20 <sup>th</sup> Mar 2019  | 0.81                       | 2.08                      | 18.32                         | 1.17                          | 2.49                            | 378.44                     | 0.11                      | 2.18                       | 0.59                          | 19.85                           |
| 20 <sup>th</sup> Mar - 1 <sup>st</sup> Apr 2019  | 1.04                       | 94.62                     | 71.56                         | 2.88                          | 12.03                           | 123.40                     | 1.31                      | 0.56                       | 0.37                          | 24.60                           |
| 1 <sup>st</sup> Apr - 16 <sup>th</sup> Apr 2019  | 0.86                       | 15.13                     | 7.01                          | 1.14                          | 2.93                            | 1039.73                    | 2.14                      | 5.70                       | 1.49                          | 61.17                           |
| 16 <sup>th</sup> Apr - 29 <sup>th</sup> Apr 2019 | 0.79                       | 11.22                     | 33.88                         | 2.31                          | 2.95                            | 198.16                     | 0.33                      | 1.18                       | 0.63                          | 12.75                           |
| 29 <sup>th</sup> Apr - 15 <sup>th</sup> May 2019 | 0.72                       | 2.47                      | 17.55                         | 1.19                          | 3.66                            | 351.32                     | 0.14                      | 2.28                       | 0.62                          | 30.54                           |
| 15 <sup>th</sup> May - 29 <sup>th</sup> May 2019 | 0.68                       | 4.49                      | 35.61                         | 2.33                          | 5.19                            | 162.57                     | 0.13                      | 1.12                       | 0.60                          | 21.33                           |
| 29 <sup>th</sup> May - 12 <sup>th</sup> Jun 2019 | 0.56                       | 25.20                     | 150.92                        | 4.09                          | 21.03                           | 31.53                      | 0.17                      | 0.26                       | 0.25                          | 20.38                           |
| 12 <sup>th</sup> Jun - 26 <sup>th</sup> Jun 2019 | 0.42                       | 45.94                     | 389.42                        | 11.87                         | 26.98                           | 9.11                       | 0.12                      | 0.10                       | 0.28                          | 10.14                           |
| 26 <sup>th</sup> Jun - 10 <sup>th</sup> Jul 2019 | 0.71                       | 11.06                     | 99.36                         | 2.91                          | 10.53                           | 60.94                      | 0.11                      | 0.40                       | 0.27                          | 15.50                           |

**Table S5.** Enrichment factors in wet deposition samples.

| Measuring period                                 | MARINE                     |                           |                               |                               |                                 | CRUSTAL                    |                           |                            |                               |                                 |
|--------------------------------------------------|----------------------------|---------------------------|-------------------------------|-------------------------------|---------------------------------|----------------------------|---------------------------|----------------------------|-------------------------------|---------------------------------|
|                                                  | $\text{EF}_m(\text{Cl}^-)$ | $\text{EF}_m(\text{K}^+)$ | $\text{EF}_m(\text{Ca}^{2+})$ | $\text{EF}_m(\text{Mg}^{2+})$ | $\text{EF}_m(\text{SO}_4^{2-})$ | $\text{EF}_c(\text{Cl}^-)$ | $\text{EF}_c(\text{K}^+)$ | $\text{EF}_c(\text{Na}^+)$ | $\text{EF}_c(\text{Mg}^{2+})$ | $\text{EF}_c(\text{SO}_4^{2-})$ |
| 6 <sup>th</sup> Feb - 20 <sup>th</sup> Feb 2019  | 1.02                       | 2.26                      | 8.88                          | 1.25                          | 4.42                            | 975.78                     | 0.25                      | 4.50                       | 1.29                          | 72.75                           |
| 5 <sup>th</sup> Mar - 20 <sup>th</sup> Mar 2019  | 0.79                       | 2.04                      | 11.78                         | 1.13                          | 2.54                            | 573.75                     | 0.17                      | 3.39                       | 0.88                          | 31.50                           |
| 20 <sup>th</sup> Mar - 1 <sup>st</sup> Apr 2019  | 0.77                       | 3.60                      | 17.95                         | 1.18                          | 5.84                            | 363.03                     | 0.20                      | 2.23                       | 0.60                          | 47.64                           |
| 1 <sup>st</sup> Apr - 16 <sup>th</sup> Apr 2019  | 0.75                       | 2.85                      | 6.58                          | 1.00                          | 5.23                            | 964.99                     | 0.43                      | 6.07                       | 1.40                          | 116.31                          |
| 16 <sup>th</sup> Apr - 29 <sup>th</sup> Apr 2019 | 0.74                       | 4.72                      | 27.61                         | 1.45                          | 3.54                            | 226.74                     | 0.17                      | 1.45                       | 0.48                          | 18.75                           |
| 29 <sup>th</sup> Apr - 15 <sup>th</sup> May 2019 | 0.73                       | 3.16                      | 18.15                         | 1.10                          | 4.79                            | 340.10                     | 0.17                      | 2.20                       | 0.56                          | 38.63                           |
| 15 <sup>th</sup> May - 29 <sup>th</sup> May 2019 | 0.71                       | 3.30                      | 34.91                         | 1.58                          | 6.33                            | 172.95                     | 0.09                      | 1.14                       | 0.42                          | 26.53                           |
| 29 <sup>th</sup> May - 12 <sup>th</sup> Jun 2019 | 0.80                       | 6.78                      | 38.49                         | 1.38                          | 12.30                           | 177.69                     | 0.17                      | 1.04                       | 0.33                          | 46.76                           |
| 26 <sup>th</sup> Jun - 10 <sup>th</sup> Jul 2019 | 0.67                       | 7.04                      | 41.29                         | 1.54                          | 7.14                            | 138.68                     | 0.17                      | 0.97                       | 0.34                          | 25.30                           |

## Section S1

### *Acidity and neutralization capacity of atmospheric deposition*

Several approaches for assessing the acidification and neutralization capacity of bulk and wet deposition were applied and discussed in this study. As acidity of atmospheric deposition primary depends on the amount of most abundant anions,  $\text{NO}_3^-$  and  $\text{SO}_4^{2-}$ , the equivalent ratio  $[\text{H}^+] / [\text{NO}_3^- + \text{SO}_4^{2-}]$  shows whether the acidity contributed by these strong anions is neutralized or not (Balasubramanian et al. 2001; Anatolaki and Tsitouridou 2009; Chen et al. 2020). This ratio is called fractional acidity (FA) and it would be equal to 1 if the acidity of atmospheric deposition caused by strong acids ( $\text{H}_2\text{SO}_4$  and  $\text{HNO}_3$ ) is not completely neutralized by alkaline cations, while deviations from 1 show the percentage level of neutralized acidic compounds. Furthermore, ratios of anion equivalent concentrations  $[\text{NO}_3^-] / [\text{NO}_3^- + \text{SO}_4^{2-}]$  or  $[\text{SO}_4^{2-}] / [\text{NO}_3^- + \text{SO}_4^{2-}]$  can be used to assess their contribution in the deposition acidification (Shen et al. 2012). On the other hand, the buffering ability of cations in atmospheric deposition can be estimated using the neutralization factor ( $\text{NF}_i$ ) according to equation (1) (Anatolaki and Tsitouridou 2009; Calvo et al. 2010; Conradie et al. 2016; Ma et al. 2021; Pereira et al. 2021):

$$\text{NF}_i = [\text{X}_i] / [\text{nssSO}_4^{2-} + \text{NO}_3^-] \quad (\text{S1})$$

where  $\text{X}_i$  is the equivalent concentration of alkaline species  $[\text{Na}^+, \text{Ca}^{2+}, \text{K}^+, \text{Mg}^{2+}, \text{NH}_4^+]$  in  $\mu\text{eq L}^{-1}$  and  $[\text{SO}_4^{2-} + \text{NO}_3^-]$  is the sum of equivalent concentrations of  $\text{SO}_4^{2-}$  and  $\text{NO}_3^-$ . Although this model may overestimate neutralization factors for alkaline species due to undetermined anions in the denominator such as bicarbonate or organic acids, it is well accepted in the literature to quantify its relative importance and magnitude of atmospheric deposition neutralization.

Many studies express acid-base relations between determined ionic compounds in atmospheric deposition through the ion balance (Shen et al. 2012; Xing et al. 2017; Meng et al. 2019; Ma et al. 2021). The ratio  $\Sigma \text{A}^- / \Sigma \text{K}^+$  (sum of anion equivalents/ sum of cation equivalents) lower than 1 indicates the acidic properties of the deposition; however, greater deviation could indicate possible missing of parameters like  $\text{HCO}_3^-$  or organic acidic ions (Ma et al. 2021). Some authors (Anatolaki and Tsitouridou 2009; Keresztesi et al. 2019) therefore, suggest to calculate  $[\text{HCO}_3^-]$  equivalent concentrations (in  $\text{eq L}^{-1}$ ) by using equation (2):

$$[\text{HCO}_3^-] = 10^{-11.24+\text{pH}} \quad (\text{S2})$$

Another method for estimation of the neutralizing capacity of alkaline ions over acidic ones is by calculating the ratio of neutralization potential (NP) to acidification potential (AP) according to the equation (3) (Safai et al. 2004; Chen et al. 2020). NP/AP ratio higher than 1 may indicate that the overall dominance of alkaline ionic species prevents the acidity of bulk deposition.

$$\text{NP/AP} = [\text{nssCa}^{2+}] + [\text{NH}_4^+] / [\text{nssSO}_4^{2-}] + [\text{NO}_3^-] \quad (\text{S3})$$

The non-seasalt fractions  $[\text{nssCa}^{2+}]$  and  $[\text{nssSO}_4^{2-}]$  were calculated using methodology described in Keene et al. (1986) where the  $\text{nss}[\text{SO}_4^{2-}] = [\text{SO}_4^{2-}]_{\text{total}} - \text{ss}[\text{SO}_4^{2-}]$  and  $\text{nss}[\text{Ca}^{2+}] = [\text{Ca}^{2+}]_{\text{total}} - \text{ss}[\text{Ca}^{2+}]$  were calculated by subtracting the sea-salt fraction of each ion from the total measured amount. The sea-salt fraction was calculated from seawater ratio  $\text{ss}[\text{SO}_4^{2-}] / [\text{Na}^+] = 0.12$  and  $\text{ss}[\text{Ca}^{2+}] / [\text{Na}^+] = 0.04$ . All concentrations are given in  $\mu\text{eq L}^{-1}$ .

Anatolaki and Tsitouridou (2009) and Meng et al., (2019) investigated the relationship between anions and cations using multiple linear regression analysis (MLR). The main acidic anions,  $\text{SO}_4^{2-}$  and  $\text{NO}_3^-$ , were considered as dependent variables, while cations  $\text{Ca}^{2+}$ ,  $\text{NH}_4^+$  and  $\text{H}^+$ , for which the highest linear correlation coefficients were obtained, were considered as independent variables.

All above mentioned models were applied and discussed in this study.

## References

- Anatolaki C, Tsitouridou R (2009) Relationship between acidity and ionic composition of wet precipitation. A two years study at an urban site, Thessaloniki, Greece. *Atmos Res* 92:100–113. <https://doi.org/10.1016/j.atmosres.2008.09.008>

- Balasubramanian, R. Victor, T. Chun N (2001) Chemical and statistical analysis of precipitation in Singapore. *Water Air Soil Pollut* 130:451–456. <https://doi.org/10.1023/A:1013801805621>
- Calvo AI, Olmo FJ, Lyamani H, et al (2010) Chemical composition of wet precipitation at the background EMEP station in Vízcar (Granada, Spain) (2002–2006). *Atmos Res* 96:408–420. <https://doi.org/10.1016/j.atmosres.2010.01.013>
- Cerro, J.C.; Cerdà, V.; Caballero, S.; Bujosa, C.; Alastuey, A.; Querol, X.; Pey, J. Chemistry of Dry and Wet Atmospheric Deposition over the Balearic Islands, NW Mediterranean: Source Apportionment and African Dust Areas. *Sci. Total Environ.* 2020, 747, 141187, doi:10.1016/j.scitotenv.2020.141187
- Chen HY, Hsu LF, Huang SZ, Zheng L (2020) Assessment of the components and sources of acid deposition in northeast asia: A case study of the coastal and metropolitan cities in Northern Taiwan. *Atmosphere (Basel)* 11:. <https://doi.org/10.3390/atmos11090983>
- Conradie EH, Van Zyl PG, Pienaar JJ, et al (2016) The chemical composition and fluxes of atmospheric wet deposition at four sites in South Africa. *Atmos Environ* 146:113–131. <https://doi.org/10.1016/j.atmosenv.2016.07.033>
- Izquierdo, R.; Avila, A. Comparison of Collection Methods to Determine Atmospheric Deposition in a Rural Mediterranean Site (NE Spain). *J. Atmos. Chem.* 2012, 69, 351–368, doi:10.1007/s10874-012-9246-1
- Kara, M.; Dumanoglu, Y.; Altioek, H.; Elbir, T.; Odabasi, M.; Bayram, A. Seasonal and Spatial Variations of Atmospheric Trace Elemental Deposition in the Aliaga Industrial Region, Turkey. *Atmos. Res.* 2014, 149, 204–216, doi:10.1016/j.atmosres.2014.06.009
- Keene WC, Pszenny AAP, Galloway JN, Hawley ME (1986) Sea-salt corrections and interpretation of constituent ratios in marine precipitation. *J Geophys Res* 91:6647. <https://doi.org/10.1029/jd091id06p06647>
- Keresztesi Á, Birsan MV, Nita IA, et al (2019) Assessing the neutralisation, wet deposition and source contributions of the precipitation chemistry over Europe during 2000–2017. *Environ Sci Eur* 31:1–15. <https://doi.org/10.1186/s12302-019-0234-9>
- Keresztesi, Á.; Nita, I.A.; Birsan, M.V.; Bodor, Z.; Pernyeszi, T.; Micheu, M.M.; Szép, R. Assessing the Variations in the Chemical Composition of Rainwater and Air Masses Using the Zonal and Meridional Index. *Atmos. Res.* 2020, 237, 104846, doi:10.1016/j.atmosres.2020.104846
- Ma L, Dadashazar H, Hilario MRA, et al (2021) Contrasting wet deposition composition between three diverse islands and coastal North American sites. *Atmos Environ* 244:117919. <https://doi.org/10.1016/j.atmosenv.2020.117919>
- Meng Y, Zhao Y, Li R, et al (2019) Characterization of inorganic ions in rainwater in the megacity of Shanghai: Spatiotemporal variations and source apportionment. *Atmos Res* 222:12–24. <https://doi.org/10.1016/j.atmosres.2019.01.023>
- Morera-Gómez, Y.; Santamaría, J.M.; Elustondo, D.; Lasheras, E.; Alonso-Hernández, C.M. Determination and Source Apportionment of Major and Trace Elements in Atmospheric Bulk Deposition in a Caribbean Rural Area. *Atmos. Environ.* 2019, 202, 93–104, doi:10.1016/j.atmosenv.2019.01.019
- Pereira JN, Fornaro A, Vieira-Filho M (2021) Source Apportionment of Atmospheric Deposition Species in an Agricultural Brazilian Region Using Positive Matrix Factorization. 12. <https://doi.org/10.3390/ecas2021-10698>
- Pieri, L.; Matzneller, P.; Gaspari, N.; Marotti, I.; Dinelli, G.; Rossi, P. Bulk Atmospheric Deposition in the Southern Po Valley (Northern Italy). *Water. Air. Soil Pollut.* 2010, 210, 155–169, doi:10.1007/s11270-009-0238-y
- Rossini, P.; Guerzoni, S.; Molinaroli, E.; Rampazzo, G.; De Lazzari, A.; Zancanaro, A. Atmospheric Bulk Deposition to the Lagoon of Venice: Part I. Fluxes of Metals, Nutrients and Organic Contaminants. *Environ. Int.* 2005, 31, 959–974, doi:10.1016/j.envint.2005.05.006
- Safai PD, Rao PSP, Momin GA, et al (2004) Chemical composition of precipitation during 1984–2002 at Pune, India. *Atmos Environ* 38:1705–1714. <https://doi.org/10.1016/j.atmosenv.2003.12.016>
- Shen Z, Zhang L, Cao J, et al (2012) Chemical composition, sources, and deposition fluxes of water-soluble inorganic ions obtained from precipitation chemistry measurements collected at an urban site in northwest China. *J Environ Monit* 14:3000–3008. <https://doi.org/10.1039/c2em30457k>
- Xing J, Song J, Yuan H, et al (2017) Chemical characteristics, deposition fluxes and source apportionment of precipitation components in the Jiaozhou Bay, North China. *Atmos Res* 190:10–20. <https://doi.org/10.1016/j.atmosres.2017.02.001>
